# Supplementary material
Source: PubMed Central journal article supplement (PMC11028121)
Supplement: 262_2017_2080_MOESM1_ESM.pdf [file 262_2017_2080_MOESM1_ESM.pdf]

**Supplementary Table 1** Summary of patient characteristics

| Characteristic                    | Number of patients (%) |
|-----------------------------------|------------------------|
| Age (range) in years              | 55.6 (23-79)           |
| Gender                            |                        |
| Male                              | 35 (64.8)              |
| Female                            | 19 (35.2)              |
| Tumor size (largest diameter, cm) | 6.3 (3-12)             |
| Tumor location                    |                        |
| Sacral vertebra                   | 42 (77.8)              |
| Cervical vertebra                 | 6 (11.1)               |
| Thoracic vertebra                 | 4 (7.4)                |
| Lumbar vertebra                   | 2 (3.7)                |
| Surrounding muscle invasion       |                        |
| Yes                               | 35 (64.8)              |
| No                                | 19 (35.2)              |
| Preoperative recurrence           |                        |
| Yes                               | 11 (20.4)              |
| No                                | 43 (79.6)              |
| Tumor grade                       |                        |
| High                              | 38 (70.4)              |
| Low                               | 16 (29.6)              |
| Tumor stage                       |                        |
| IA                                | 13 (24.1)              |
| IB                                | 6 (11.1)               |
| IIA                               | 4 (7.4)                |
| IIB                               | 27 (50)                |
| III                               | 4 (7.4)                |
| Type of resection                 |                        |
| EI                                | 17 (31.5)              |
| EA                                | 37 (68.5)              |
| Tumor hemorrhage                  |                        |
| No                                | 10 (18.5)              |
| Yes                               | 44 (81.5)              |
| Tumor necrosis                    |                        |
| Absent                            | 13 (24.1)              |
| Mild                              | 18 (33.3)              |
| Moderate                          | 15 (27.8)              |
| Severe                            | 8 (14.8)               |
| Level of overall TILs             |                        |
| Absent                            | 0 (0)                  |
| Rare/few                          | 23 (42.6)              |

|                                                       |               |
|-------------------------------------------------------|---------------|
| Moderate                                              | 15 (27.8)     |
| Prominent                                             | 16 (29.6)     |
| Ki-67 staining index                                  |               |
| Low                                                   | 25 (46.3)     |
| High                                                  | 29 (53.7)     |
| Number of TILs subsets (cells/mm <sup>2</sup> )       |               |
| PD-1 <sup>+</sup> TILs, mean ± SD                     | 151.8 ± 121.7 |
| PD-L1 <sup>+</sup> TILs, mean ± SD                    | 288.0 ± 182.5 |
| CD8 <sup>+</sup> TILs, mean ± SD                      | 311.0 ± 274.8 |
| Foxp3 <sup>+</sup> TILs, mean ± SD                    | 132.0 ± 115.0 |
| CD8 <sup>+</sup> /Foxp3 <sup>+</sup> ratio, mean ± SD | 3.3 ± 3.1     |
| Survival during follow-up                             |               |
| Death                                                 | 24 (44.4%)    |
| Alive                                                 | 30 (55.6%)    |
| Relapse during follow-up                              |               |
| Yes                                                   | 41 (75.9%)    |
| No                                                    | 13 (24.1%)    |

---

EI, Enneking inappropriate; EA, Enneking appropriate; TILs, tumor-infiltrating lymphocytes; PD-1, programmed cell death 1; PD-L1, programmed cell death-1 ligand 1; SD, standard deviation.

**Supplementary Table 2** List of the specific primers that were used in this study

| Gene        | Forward                     | Reverse                    |
|-------------|-----------------------------|----------------------------|
| miR-574-3p  | 5'-GGCGCACGCTCATGCACACA-3'  | 5'-GTGCAGGGTCCGAGGT-3'     |
| miR-4731-3p | 5'-GGCGCACACAAGTGGCCCCC-3'  | 5'-GTGCAGGGTCCGAGGT-3'     |
| miR-4433-5p | 5'-GGCGCGTCCCACCCCCAC-3'    | 5'-GTGCAGGGTCCGAGGT-3'     |
| miR-671-5p  | 5'-GGCGAGGAAGCCCTGGAGGGG-3' | 5'-GTGCAGGGTCCGAGGT-3'     |
| miR-371b-5p | 5'-GGCGACTCAAAGATGGCGG-3'   | 5'-GTGCAGGGTCCGAGGT-3'     |
| miR-1225-3p | 5'-GGCGTGAGCCCCTGTGCCGC-3'  | 5'-GTGCAGGGTCCGAGGT-3'     |
| U6          | 5'-CTCGCTTCGGCAGCACA-3'     | 5'-AACGCTTCACGAATTTGCGT-3' |

**Supplementary Table 3** Candidate miRNAs from microarray and bioinformatical analysis that could potentially regulate PD-L1 expression in spinal chordoma

| miRNAs          | <i>P</i> -value | Fold change | FDR <sup>a</sup> | Expression | Sequence         |
|-----------------|-----------------|-------------|------------------|------------|------------------|
| hsa-miR-574-3p  | 2.72E-02        | 4.98        | 0.03210          | down       | TGTGGGTGTGTGCATG |
| hsa-miR-4731-3p | 5.41E-03        | 10.81       | 0.00782          | down       | AGTGTTGGGGGCCA   |
| hsa-miR-4433-5p | 1.73E-02        | 3.82        | 0.02975          | down       | ACAGGAGTGGGGGG   |
| hsa-miR-671-5p  | 6.43E-03        | 2.61        | 0.00684          | down       | CTCCAGCCCCT      |
| hsa-miR-371b-5p | 2.84E-02        | 2.30        | 0.00622          | down       | AAAGTGCCGCCATCT  |
| hsa-miR-1225-3p | 9.38E-03        | 12.08       | 0.02133          | down       | CTGGGGGCGGC      |

miRNA, microRNA; FDR, false discovery rate; <sup>a</sup>FDR < 0.05

**Supplementary Table 4** Frequency of infiltration pattern according to TILs subsets in the chordoma microenvironment

| TILs subtypes      | Frequency of infiltration pattern |          |          |           |
|--------------------|-----------------------------------|----------|----------|-----------|
|                    | Absent                            | Rare/few | Moderate | Prominent |
| PD-1 <sup>+</sup>  | 0                                 | 15       | 20       | 19        |
| PD-L1 <sup>+</sup> | 0                                 | 24       | 18       | 12        |
| Foxp3 <sup>+</sup> | 4                                 | 22       | 14       | 14        |
| CD8 <sup>+</sup>   | 10                                | 17       | 14       | 13        |

TILs, tumor-infiltrating lymphocytes; PD-1, programmed cell death 1; PD-L1, programmed cell death-1 ligand 1.

**Supplementary Table 5** Correlations between tumor PD-L1 expression, miR-574-3p level and microenvironmental TILs in spinal chordoma (n = 54)

|                                               | miR-574-3p expression | PD-L1 expression (positive vs negative) | Extent of overall TILs (positive vs negative) | PD-1 <sup>+</sup> TILs number | PD-L1 <sup>+</sup> TILs number    | CD8 <sup>+</sup> TILs number | Foxp3 <sup>+</sup> TILs number   | CD8 <sup>+</sup> /Foxp3 <sup>+</sup> ratio |
|-----------------------------------------------|-----------------------|-----------------------------------------|-----------------------------------------------|-------------------------------|-----------------------------------|------------------------------|----------------------------------|--------------------------------------------|
| miR-574-3p expression                         |                       | t = 3.435<br><b>P = 0.001</b>           | t = 1.345<br>P = 0.185                        | r = -0.102<br>P = 0.462       | r = -0.203<br>P = 0.140           | r = 0.156<br>P = 0.260       | r = -0.125<br>P = 0.367          | r = 0.503<br><b>P &lt; 0.001</b>           |
| PD-L1 expression (positive vs negative)       |                       |                                         | $\chi^2 = 7.953$<br><b>P = 0.005</b>          | t = 2.718<br><b>P = 0.009</b> | t = 2.951<br><b>P = 0.005</b>     | t = 1.005<br>P = 0.320       | t = 1.415<br>P = 0.163           | t = 2.764<br><b>P = 0.008</b>              |
| Extent of overall TILs (positive vs negative) |                       |                                         |                                               | t = -0.555<br>P = 0.581       | t = 1.022<br>P = 0.312            | t = 0.054<br>P = 0.957       | t = -0.285<br>P = 0.777          | t = 0.084<br>P = 0.934                     |
| PD-1 <sup>+</sup> TILs number                 |                       |                                         |                                               |                               | r = -0.521<br><b>P &lt; 0.001</b> | r = -0.188<br>P = 0.174      | r = 0.031<br>P = 0.825           | r = -0.383<br><b>P = 0.006</b>             |
| PD-L1 <sup>+</sup> TILs number                |                       |                                         |                                               |                               |                                   | r = 0.234<br>P = 0.089       | r = -0.013<br>P = 0.923          | r = 0.181<br>P = 0.208                     |
| CD8 <sup>+</sup> TILs number                  |                       |                                         |                                               |                               |                                   |                              | r = 0.595<br><b>P &lt; 0.001</b> | r = 0.302<br><b>P = 0.033</b>              |
| Foxp3 <sup>+</sup> TILs number                |                       |                                         |                                               |                               |                                   |                              |                                  | r = -0.393<br><b>P = 0.005</b>             |

TILs, tumor-infiltrating lymphocytes; PD-1, programmed cell death 1; PD-L1, programmed cell death-1 ligand

**Supplementary Table 6** List of the cut-off points for miRNA-574-3p and TILs in prognosis analysis of LRFS and OS

| Variables                                  | Cut-off values              |
|--------------------------------------------|-----------------------------|
| Outcome parameter: LRFS                    |                             |
| miRNA-574-3p                               | 8.425                       |
| PD-1 <sup>+</sup> TILs                     | 88.5 cells/mm <sup>2</sup>  |
| PD-L1 <sup>+</sup> TILs                    | 450 cells/mm <sup>2</sup>   |
| Foxp3 <sup>+</sup> TILs                    | 162.5 cells/mm <sup>2</sup> |
| CD8 <sup>+</sup> TILs                      | 5 cells/mm <sup>2</sup>     |
| CD8 <sup>+</sup> /Foxp3 <sup>+</sup> ratio | 1.090                       |
| Outcome parameter: OS                      |                             |
| miRNA-574-3p                               | 18.41                       |
| PD-1 <sup>+</sup> TILs                     | 80 cells/mm <sup>2</sup>    |
| PD-L1 <sup>+</sup> TILs                    | 446.5 cells/mm <sup>2</sup> |
| Foxp3 <sup>+</sup> TILs                    | 196.5 cells/mm <sup>2</sup> |
| CD8 <sup>+</sup> TILs                      | 402.5 cells/mm <sup>2</sup> |
| CD8 <sup>+</sup> /Foxp3 <sup>+</sup> ratio | 4.585                       |

TILs, tumor-infiltrating lymphocytes; PD-1, programmed cell death 1; PD-L1, programmed cell death-1 ligand 1; LRFS, local recurrence-free survival; OS, overall survival.

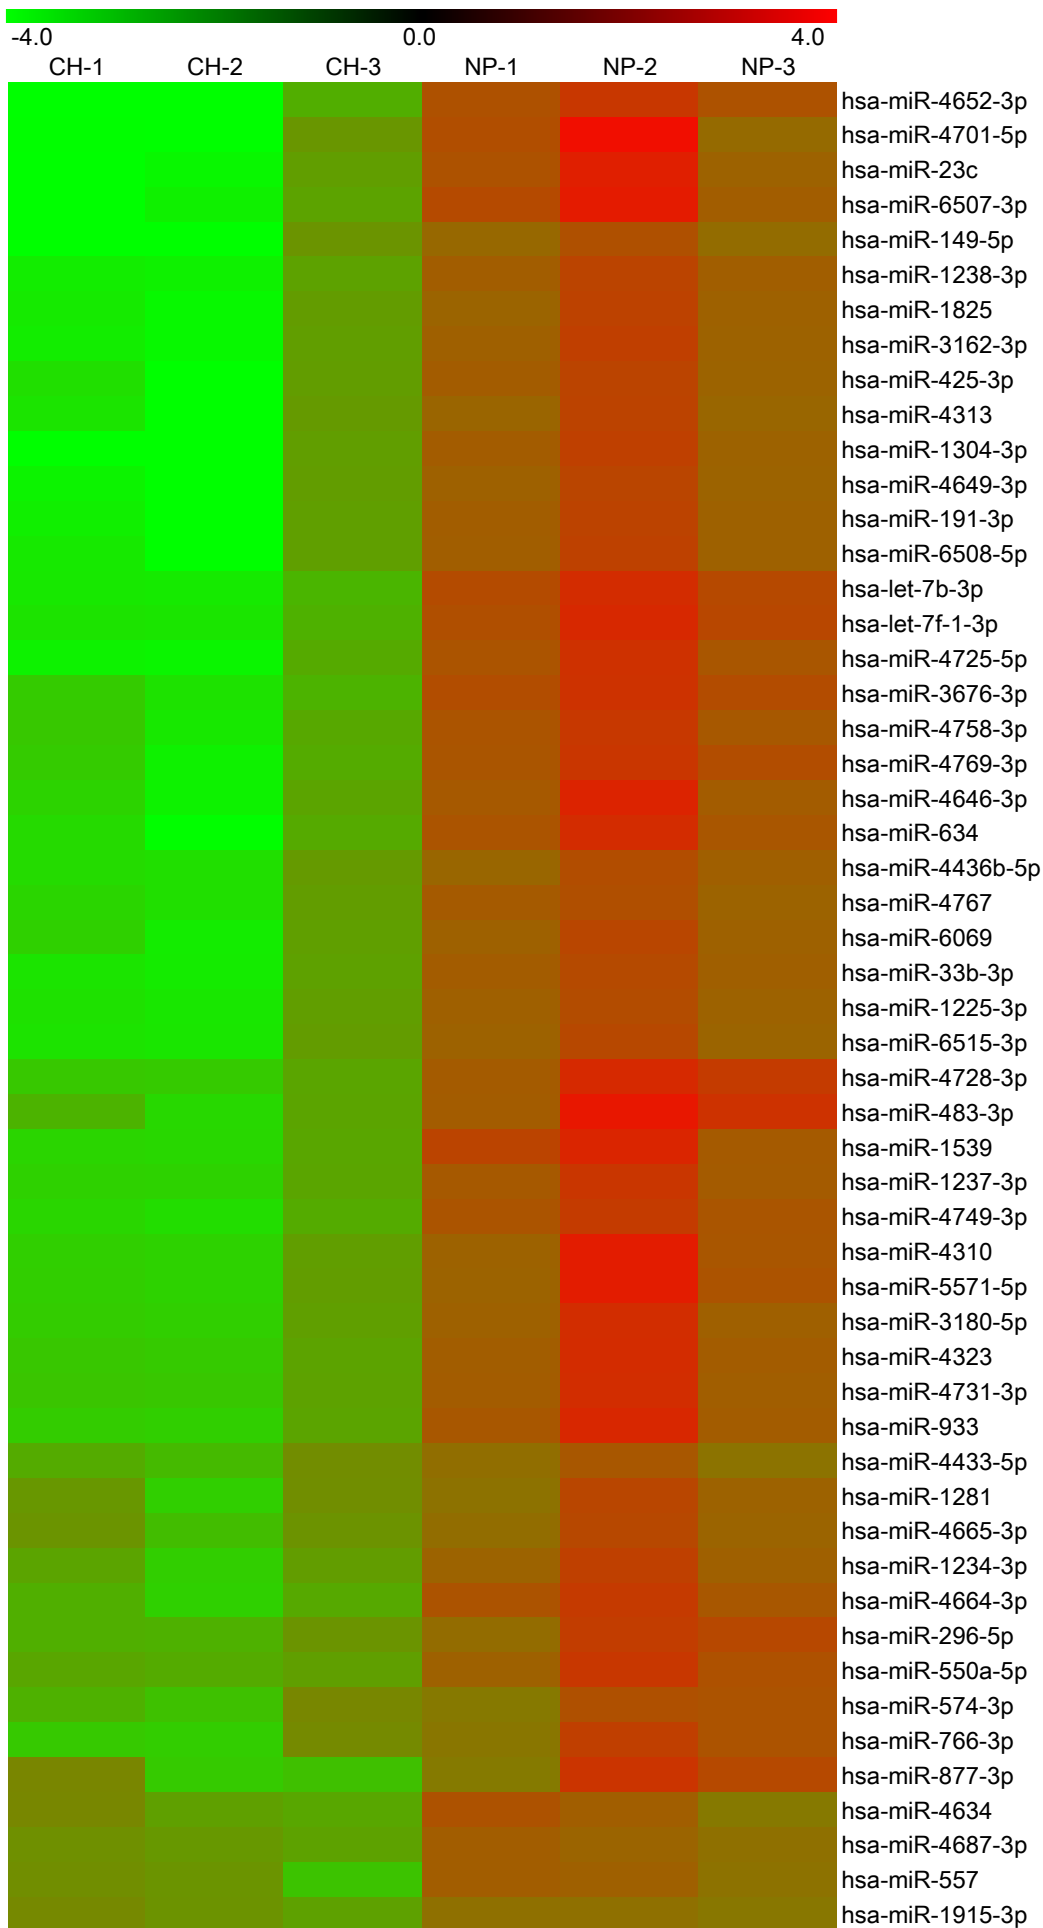



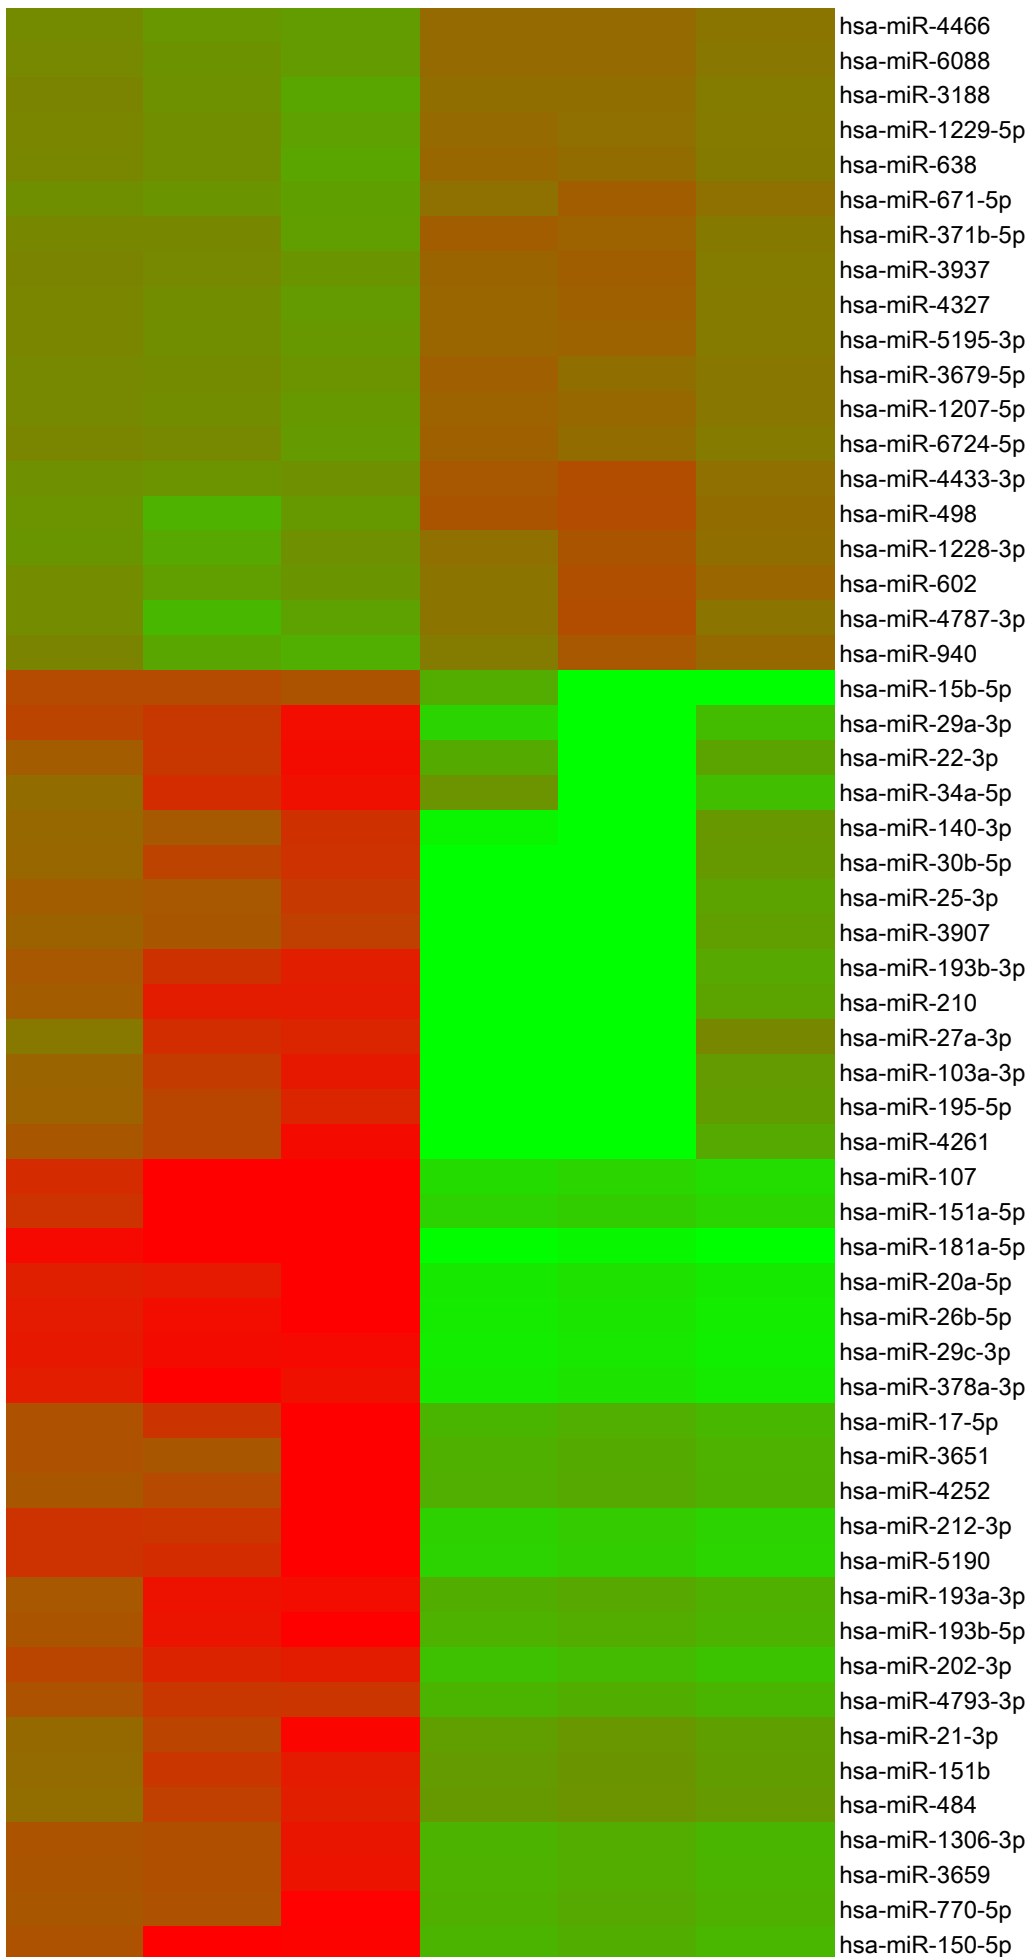

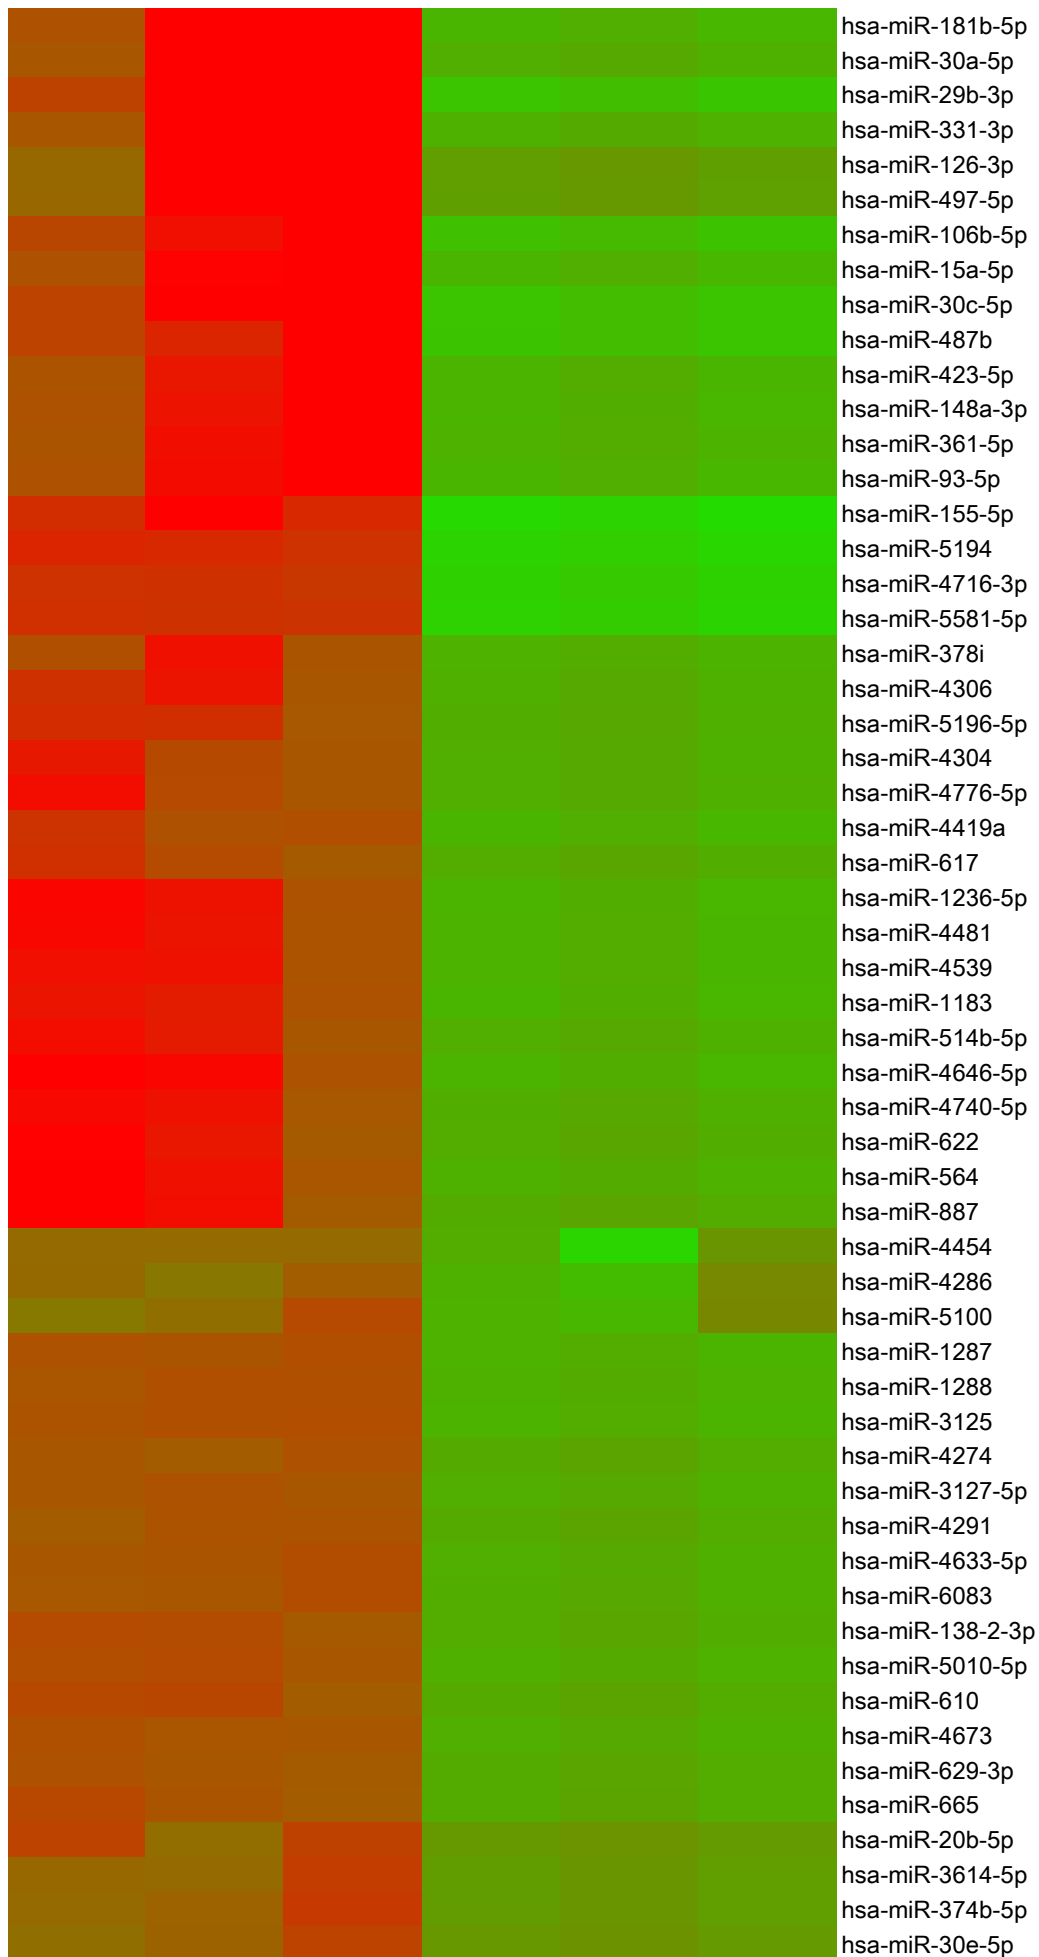

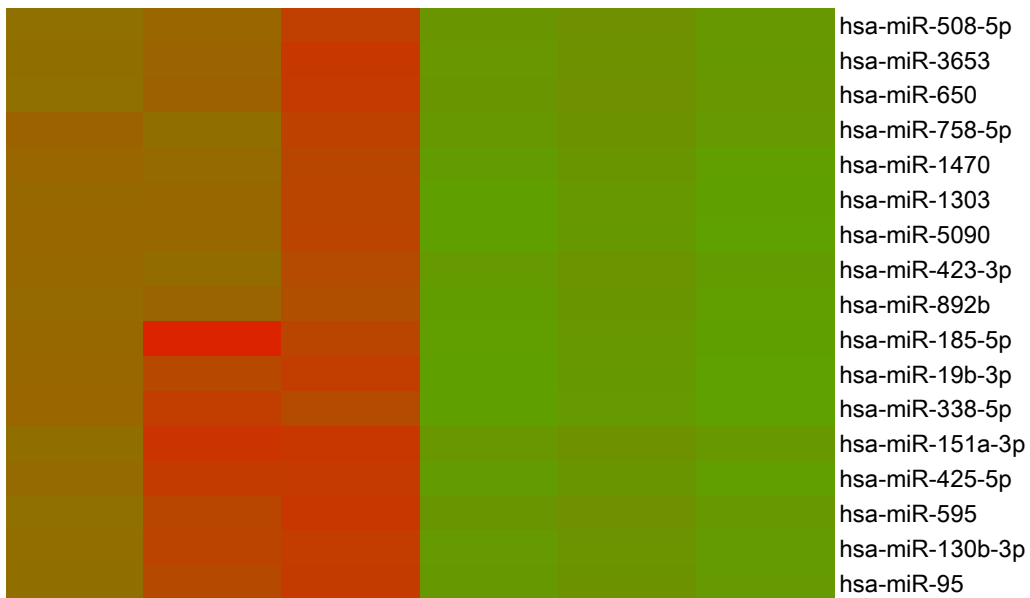

**Supplementary Figure 1** A heat-map representation of the differentially expressed miRNAs patterns in chordoma (CH) versus nucleus pulposus tissues (NP). Relative expression is presented as a colorgram (*red*: high expression).

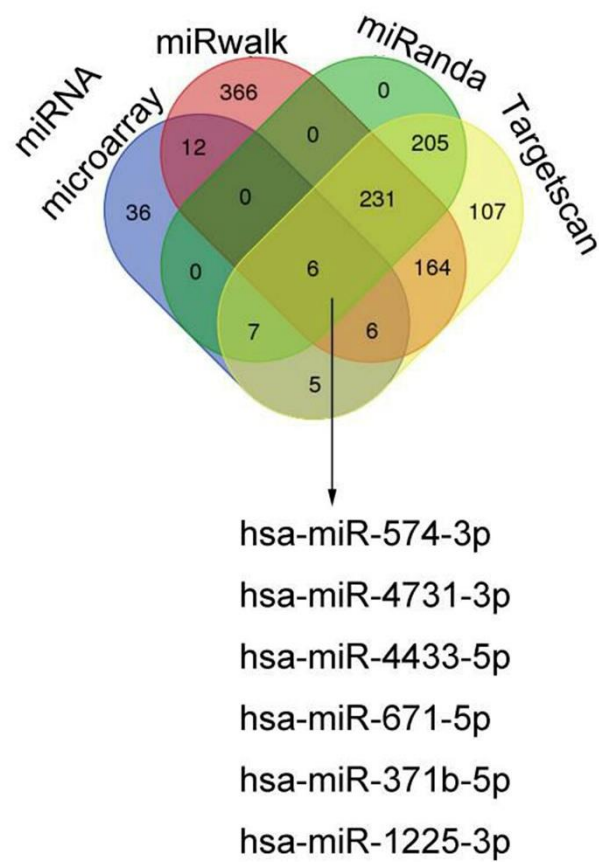

**Supplementary Figure 2** Identification of six candidate miRNAs that could potentially regulate PD-L1 expression in chordoma tissues by microarray and bioinformatical analysis.

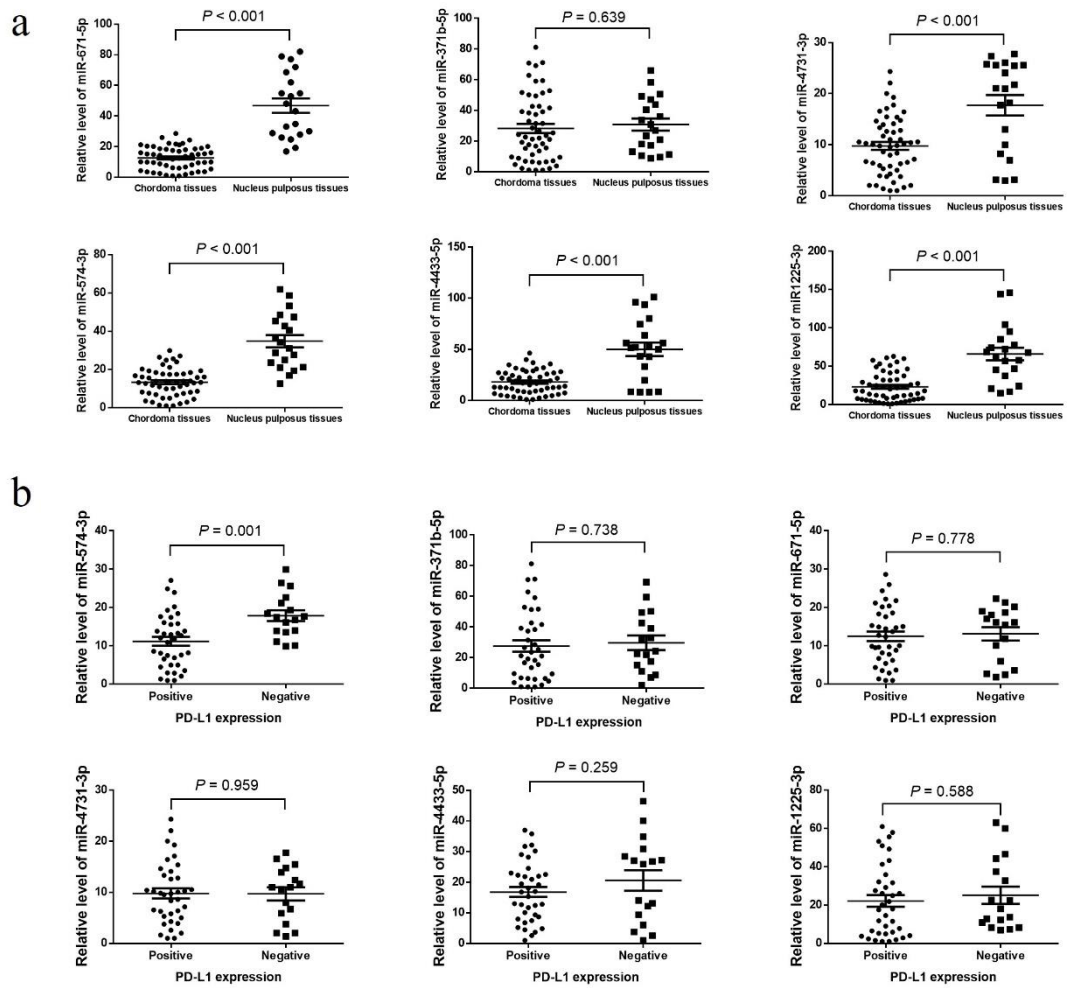

**Supplementary Figure 3** (a) Comparison of six candidate miRNAs expression by qRT-PCR in 54 chordoma and 20 nucleus pulposus tissues; (b) Association of candidate miRNAs expression and PD-L1 level in chordoma tissues.

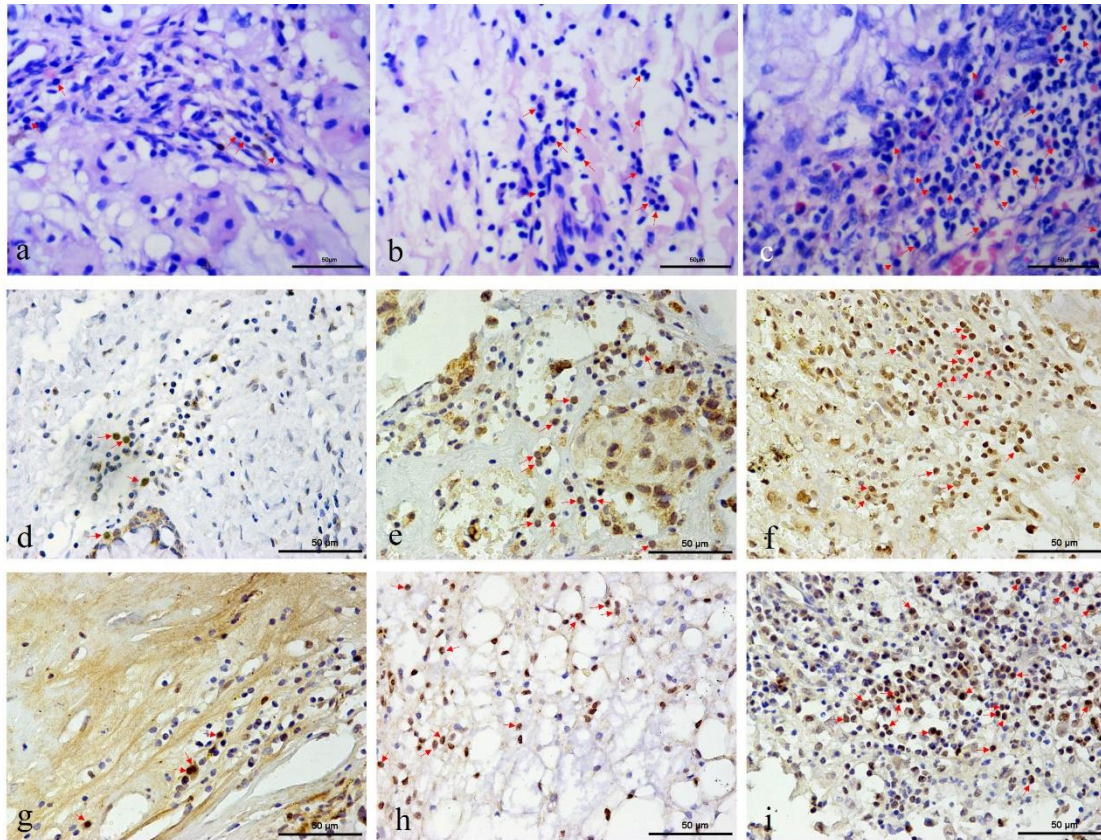

**Supplementary Figure 4** The pattern of overall TILs, PD-1<sup>+</sup> TILs and PD-L1<sup>+</sup> TILs in chordoma tissues (*red arrow*). **(a)** Rare/few TILs (HE × 400); **(b)** Moderate TILs (HE × 400); **(c)** Prominent TILs (HE × 400); **(d)** Rare/few TILs that expressed PD-1; **(e)** Moderate TILs that expressed PD-1; **(f)** Prominent TILs that expressed PD-1; **(g)** Rare/few TILs expressing PD-L1; **(h)** Moderate TILs expressing PD-L1; **(i)** Prominent TILs expressing PD-L1 (×400).

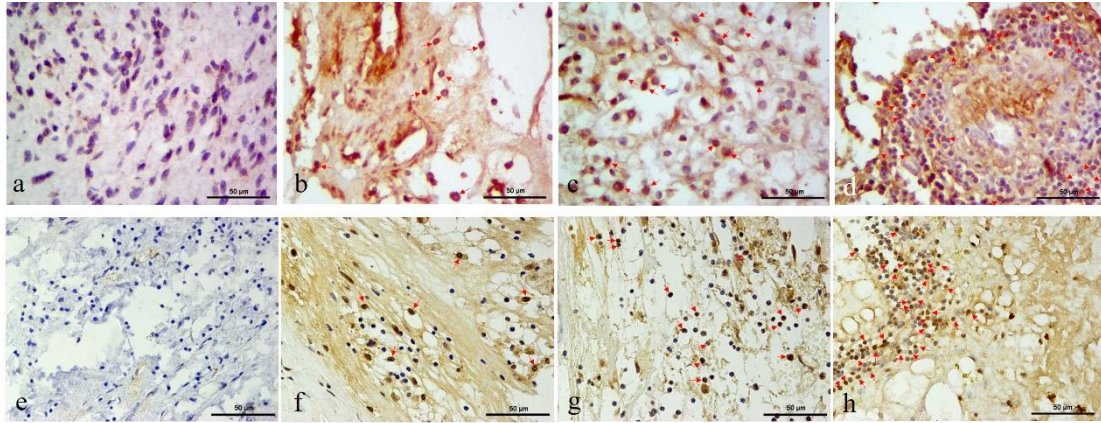

**Supplementary Figure 5** The pattern of CD8<sup>+</sup> TILs and Foxp3<sup>+</sup> TILs in chordoma tissues (*red arrow*). (a) Lack of TILs that expressed CD8 in chordoma tissues; (b) Rare/few TILs with CD8 expression; (c) Moderate TILs with CD8 expression; (d) Prominent TILs with CD8 expression; (e) Lack of TILs that expressed Foxp3 in chordoma tissues; (f) Rare/few TILs that expressed Foxp3; (g) Moderate TILs that expressed Foxp3; (h) Prominent TILs expressing Foxp3 ( $\times 400$ ).

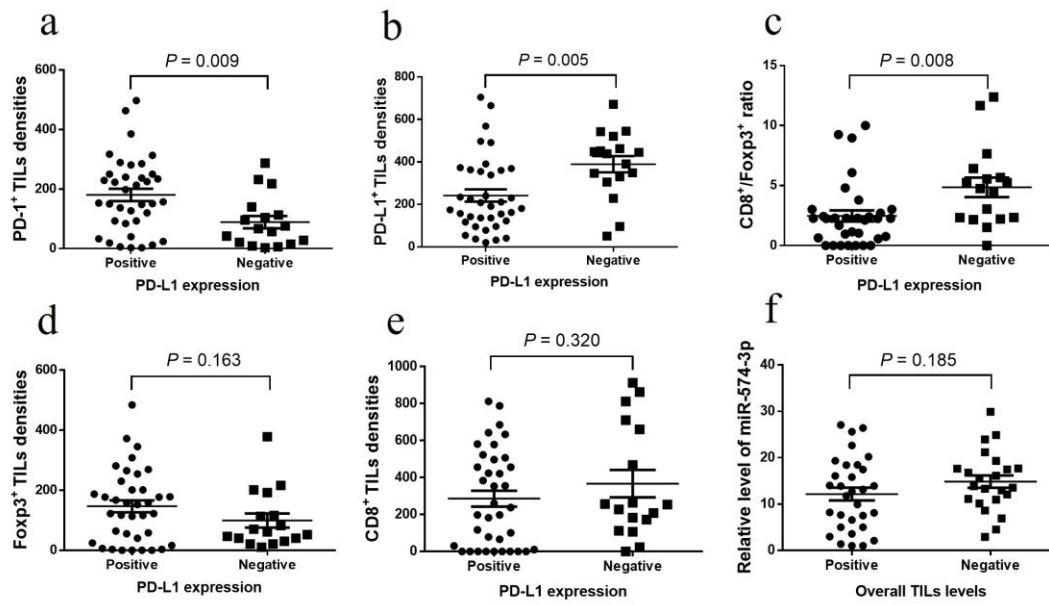

**Supplementary Figure 6** Association of PD-L1 expression and PD-1<sup>+</sup> TILs density (a), PD-L1<sup>+</sup> TILs density (b), CD8<sup>+</sup>/Foxp3<sup>+</sup> ratio (c), Foxp3<sup>+</sup> TILs density (d) and CD8<sup>+</sup> TILs density (e). Association of miR-574-3p expression and overall TILs level (f).



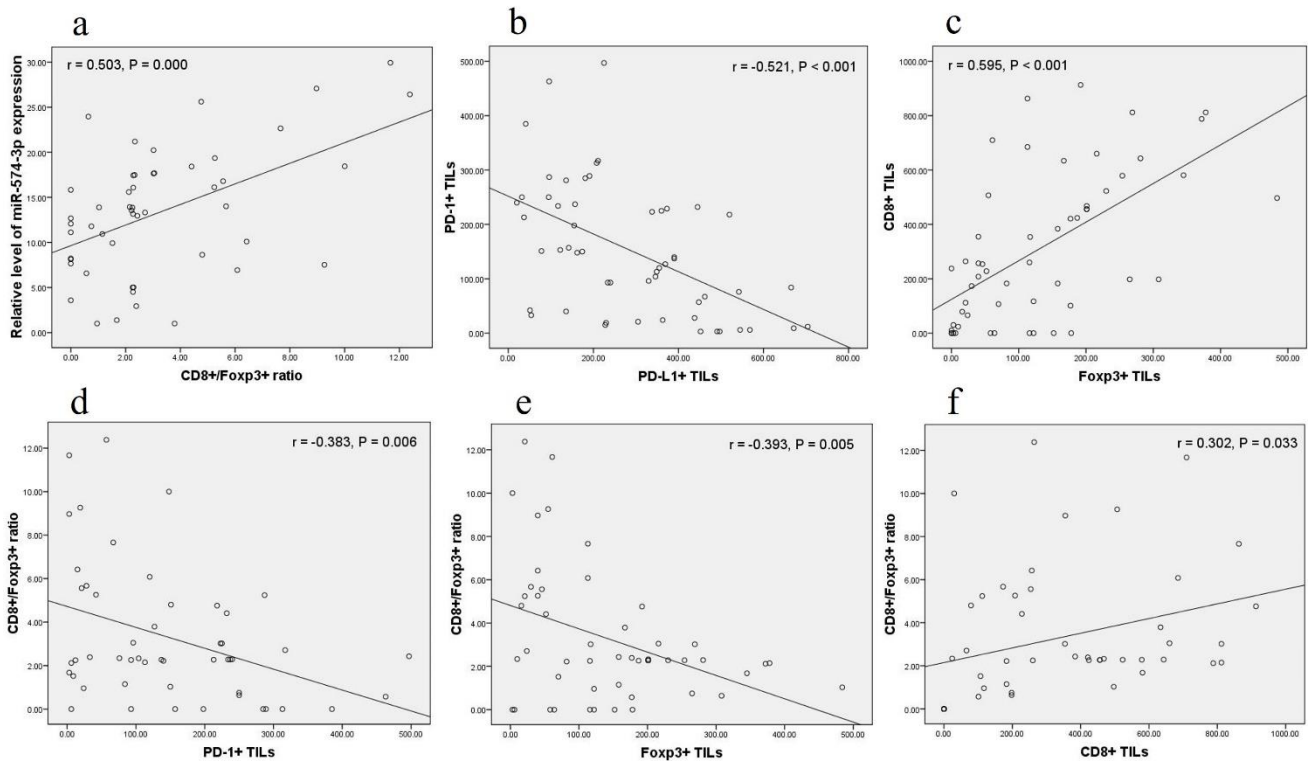

**Supplementary Figure 7** (a) Association of miR-574-3p expression and CD8<sup>+</sup>/Foxp3<sup>+</sup> ratio via Pearson correlation test; (b) Association of PD-1<sup>+</sup> TILs and PD-L1<sup>+</sup> TILs densities; (c) Association of CD8<sup>+</sup> TILs and Foxp3<sup>+</sup> TILs densities. Association of CD8<sup>+</sup>/Foxp3<sup>+</sup> ratio and PD-1<sup>+</sup> TILs density (d), Foxp3<sup>+</sup> TILs density (e) and CD8<sup>+</sup> TILs density (f).
